# Supplementary material
Source: PubMed Central journal article supplement (PMC1622831)
Supplement: pnas_0602753103_1.pdf [file pnas_0602753103_1.pdf]

1

\* \*

\*

\*

|                 |            |             |            |             |             |
|-----------------|------------|-------------|------------|-------------|-------------|
| consensus B0-02 | TGTACAATGC | TTCTATCGGC  | AGTACATAGT | ACATTTTACT  | GCATATTCGT  |
| 1-1             | .....      | .....       | .....      | .....       | .....       |
| 1-2             | .....      | .....T..... | .....      | .....T..... | .....T..... |
| 1-3             | .....      | .....       | .....      | .....       | .....       |
| 2-1             | .....      | .....       | .....      | .....       | .....       |
| 2-2             | .....      | .....       | .....      | .....       | .....       |
| 2-3             | .....      | .....T..... | .....      | .....       | .....       |
| 2-4             | .....      | .....       | .....      | .....       | .....       |
| 2-5             | .....      | .....       | .....      | .....       | .....       |
| 2-6             | .....      | .....       | .....      | .....       | .....       |
| 3-DS            | .....      | .....       | .....      | .....       | .....       |

51

\*

\*

\* \*\*

|                 |            |            |             |             |               |
|-----------------|------------|------------|-------------|-------------|---------------|
| consensus BO-02 | ACATGGCACA | TGGAGTCAAA | TCCATTCTCG  | CCAACATGCG  | TATCCC GTCC   |
| 1-1             | .....      | .....      | .....       | .....       | .....         |
| 1-2             | .....      | .....      | .....       | .....       | .....T.T..... |
| 1-3             | .....      | .....      | .....T..... | .....       | .....         |
| 2-1             | .....      | .....      | .....       | .....A..... | .....A.....   |
| 2-2             | .....      | .....      | .....       | .....A..... | .....A.....   |
| 2-3             | .....      | .....      | .....       | .....       | .....         |
| 2-4             | .....      | .....      | .....       | .....A..... | .....A.....   |
| 2-5             | .....      | .....      | .....       | .....A..... | .....A.....   |
| 2-6             | .....      | .....      | .....       | .....A..... | .....A.....   |
| 3-DS            | .....      | .....      | .....       | .....       | .....         |

101

\*\* \* \* \* \* \*

|                 |            |               |              |
|-----------------|------------|---------------|--------------|
| consensus BO-02 | ACTAGATCAC | GAGCTTGTTG    | ACCATGCCGC   |
| 1-1             | .....      | .....         | .....C.....  |
| 1-2             | .....      | .....         | .....T.....T |
| 1-3             | .....      | .....T.....   | .....        |
| 2-1             | .....      | .....A...A..A | .....        |
| 2-2             | .....      | .....A...A..A | .....        |
| 2-3             | .....      | .....         | .....        |
| 2-4             | .....      | .....A...A..A | .....        |
| 2-5             | .....      | .....A...A..A | .....        |
| 2-6             | .....      | .....A...A..A | .....        |
| 3-DS            | .....      | .....         | .....        |

1

|                 |            |            |            |            |            |
|-----------------|------------|------------|------------|------------|------------|
| Consensus BO-11 | TGTACAATAT | CCCTATCGAT | AGTACATGGC | ACATTCTATT | GTATACCCGT |
| 1-1             | .....      | .....      | .....      | .....      | .....      |
| 1-2             | .....      | .....      | .....      | .....      | .....      |
| 1-3             | .....      | .....      | .....      | .....      | .....      |
| 1-4             | .....      | .....      | .....      | .....      | .....      |
| 2-DS            | .....      | .....      | .....      | .....      | .....      |

51

\*

|                 |            |            |            |            |            |
|-----------------|------------|------------|------------|------------|------------|
| Consensus BO-11 | ACATAGCGCA | TGAAGTCAAA | TCCGTCCTCG | TCAACATGCA | TATCCCGTCC |
| 1-1             | .....      | .....      | .....      | .....      | .....      |
| 1-2             | .....      | .....      | ..A..      | .....      | .....      |
| 1-3             | .....      | .....      | .....      | .....      | .....      |
| 1-4             | .....      | .....      | .....      | .....      | .....      |
| 2-DS            | .....      | .....      | .....      | .....      | .....      |

101

\* \*

|                 |            |             |            |
|-----------------|------------|-------------|------------|
| Consensus BO-11 | ACTAGATCAC | GAGCTTG TTC | ACCATGCCGC |
| 1-1             | .....      | .....       | .....      |
| 1-2             | .....      | A.A.....    | .....      |
| 1-3             | .....      | .....       | .....      |
| 1-4             | .....      | .....       | .....      |
| 2-DS            | .....      | .....       | .....      |

1

\* \* \*

|                 |            |            |            |            |            |
|-----------------|------------|------------|------------|------------|------------|
| Consensus BO-14 | TGTACAATAT | CCCTATCGAT | AGTACATGGC | ACATTCTATT | GTATACCCGT |
| 1-1             | .....      | .....      | .....      | .....      | A.....     |
| 1-2             | .....      | .....      | .....      | .....      | .....      |
| 1-3             | .....      | .....      | .....      | .....      | .....      |
| 1-4             | .....      | .....      | .....      | .....      | .....      |
| 2-1             | .....      | .....      | .....      | .....      | .....      |
| 2-2             | .....      | .....      | .....      | .....      | .....      |
| 2-3             | .....      | .....      | .....      | .....      | .....      |
| 2-4             | .....      | .....      | .....      | .....      | .....      |
| 2-5             | .....      | .....      | .....      | .....      | .....      |
| 3-DS            | .....      | .....      | .....      | ...T...    | ...T...    |

51

\* \* \* \*\*

|                 |            |            |            |            |            |
|-----------------|------------|------------|------------|------------|------------|
| Consensus BO-14 | ACATAGCGCA | TGAAGTCAAA | TCCGTCCTCG | TCAACATGCA | TATCCCGTCC |
| 1-1             | .....      | .....      | .....      | .....      | .....      |
| 1-2             | .....      | .....      | .....      | .....      | .....      |
| 1-3             | .....      | .....      | .....      | .....      | .....      |
| 1-4             | .....      | .....      | .....      | .....      | ...T...T   |
| 2-1             | .....      | .....      | .....      | .....      | ...T.      |
| 2-2             | .....      | .....      | ..T.....   | ...T.....  | .....      |
| 2-3             | .....      | .....      | .....      | .....      | .....      |
| 2-4             | .....      | .....      | .....      | .....      | .....      |
| 2-5             | .....      | .....      | .....      | .....      | .....      |
| 3-DS            | .....      | .....      | .....      | .....      | .....T     |

101

\* \*

|                 |            |             |            |
|-----------------|------------|-------------|------------|
| Consensus BO-14 | ACTAGATCAC | GAGCTTG TTC | ACCATGCCGC |
| 1-1             | .....      | .....       | .....      |
| 1-2             | .....      | .....       | .....      |
| 1-3             | .....      | .....       | .....      |
| 1-4             | .T.....T.. | .....       | .....      |
| 2-1             | .....      | .....       | .....      |
| 2-2             | .....      | .....       | .....      |
| 2-3             | .....      | .....       | .....      |
| 2-4             | .....      | .....       | .....      |
| 2-5             | .....      | .....       | .....      |
| 3-DS            | .....      | .....       | .....      |

1

|           |       |            |            |            |            |            |
|-----------|-------|------------|------------|------------|------------|------------|
| Consensus | BO-15 | TGTACAATAT | CCCTATCGAT | AGTACATGGC | ACATTCTATT | GTATACCCGT |
| 1-1       |       | .....      | .....      | .....      | .....      | .....      |
| 1-2       |       | .....      | .....      | .....      | .....      | .....      |
| 1-3       |       | .....      | .....      | .....      | .....      | .....      |
| 1-4       |       | .....      | .....      | .....      | .....      | .....      |
| 2-1       |       | .....      | .....      | .....      | .....      | .....      |
| 2-2       |       | .....      | .....      | .....      | .....      | .....      |
| 2-3       |       | .....      | .....      | .....      | .....      | .....      |
| 2-4       |       | .....      | .....      | .....      | .....      | .....      |
| 3-DS      |       | .....      | .....      | .....      | .....      | .....      |

51

\*

|           |       |             |            |            |            |            |
|-----------|-------|-------------|------------|------------|------------|------------|
| Consensus | BO-15 | ACATAGCGCA  | TGAAGTCAAA | TCCGTCCTCG | TCAACATGCA | TATCCCGTCC |
| 1-1       |       | .....       | .....      | .....      | .....      | .....      |
| 1-2       |       | .....       | .....      | .....      | .....      | .....      |
| 1-3       |       | .....       | .....      | .....      | .....      | .....      |
| 1-4       |       | .....       | .....      | .....      | .....      | .....      |
| 2-1       |       | .....T..... | .....      | .....      | .....      | .....      |
| 2-2       |       | .....       | .....      | .....      | .....      | .....      |
| 2-3       |       | .....       | .....      | .....      | .....      | .....      |
| 2-4       |       | .....       | .....      | .....      | .....      | .....      |
| 3-DS      |       | .....       | .....      | .....      | .....      | .....      |

101

\*

|           |       |            |             |            |
|-----------|-------|------------|-------------|------------|
| Consensus | BO-15 | ACTAGATCAC | GAGCTTGTTTC | ACCATGCCGC |
| 1-1       |       | .....      | .....       | .....      |
| 1-2       |       | .....      | .....       | .....      |
| 1-3       |       | .....      | .....       | .....      |
| 1-4       |       | .....      | .....       | .....      |
| 2-1       |       | .....      | .....       | .....      |
| 2-2       |       | .....      | .....       | .....      |
| 2-3       |       | .....      | .....       | .....      |
| 2-4       |       | .....      | .....       | .....      |
| 3-DS      |       | .....      | .....T..... | .....      |

1

|           |       |            |            |            |            |            |
|-----------|-------|------------|------------|------------|------------|------------|
| Consensus | BO-19 | TGTACAATAT | CCCTATCGAT | AGTACATGGC | ACATTCTATT | GTATACTCGT |
| 1-1       |       | .....      | .....      | .....      | .....      | .....      |
| 1-2       |       | .....      | .....      | .....      | .....      | .....      |
| 1-3       |       | .....      | .....      | .....      | .....      | .....      |
| 2-DS      |       | .....      | .....      | .....      | .....      | .....      |

51

|           |       |            |            |            |            |            |
|-----------|-------|------------|------------|------------|------------|------------|
| Consensus | BO-19 | ACATAGCGCA | TGAAGTCAAA | TCCGTCCTCG | TCAACATGCA | TATCCCGTCC |
| 1-1       |       | .....      | .....      | .....      | .....      | .....      |
| 1-2       |       | .....      | .....      | .....      | .....      | .....      |
| 1-3       |       | .....      | .....      | .....      | .....      | .....      |
| 2-DS      |       | .....      | .....      | .....      | .....      | .....      |

101

|           |       |            |             |            |
|-----------|-------|------------|-------------|------------|
| Consensus | BO-19 | ACTAGATCAC | GAGCTTG TTC | ACCATGCCGC |
| 1-1       |       | .....      | .....       | .....      |
| 1-2       |       | .....      | .....       | .....      |
| 1-3       |       | .....      | .....       | .....      |
| 2-DS      |       | .....      | .....       | .....      |

1

\*

|                 |            |            |            |            |            |
|-----------------|------------|------------|------------|------------|------------|
| Consensus BO-23 | TGTACAATGC | TTCTATCGGC | AGTACATAGT | ACATTTTACT | GCATATTCGT |
| 1-1             | .....      | .....      | .....      | .....      | .....      |
| 1-2             | .....      | .....      | .....      | .....      | .....      |
| 1-3             | .....      | .....      | .....      | .....      | .....      |
| 2-1             | .....      | .....      | .....      | .....      | .....      |
| 2-2             | .....      | .....      | .....      | .....      | .....      |
| 3-1             | .....      | .....      | .....T     | .....      | .....      |
| 3-2             | .....      | .....      | .....      | .....      | .....      |
| 3-3             | .....      | .....      | .....T     | .....      | .....      |
| 3-4             | .....      | .....      | .....      | .....      | .....      |
| 4-DS            | .....      | .....      | .....      | .....      | .....      |

51

\*

\*

|                 |            |            |            |            |            |
|-----------------|------------|------------|------------|------------|------------|
| Consensus BO-23 | ACATGGCACA | TGGAGTCAAA | TCCATTCTCG | CCAACATGCG | TATCCCGTCC |
| 1-1             | .....      | .....      | .....      | .....      | .....      |
| 1-2             | .....      | .....      | .....      | .....      | .....      |
| 1-3             | .....      | .....      | .....      | .....      | .....      |
| 2-1             | .....      | .....      | .....      | .....      | .....      |
| 2-2             | .....      | .....      | .....      | .....      | .....      |
| 3-1             | .....      | .....      | .....      | .....      | .....      |
| 3-2             | .....      | .....      | .....      | .....G     | .....      |
| 3-3             | .....      | .....      | .....      | .....      | .....      |
| 3-4             | .....      | .....      | .....      | .....      | .....      |
| 4-DS            | .....      | .....A     | .....      | .....      | .....      |

101

\*

|                 |            |            |            |
|-----------------|------------|------------|------------|
| Consensus BO-23 | ACTAGATCAC | GAGCTTGTTG | ACCATGCCGC |
| 1-1             | .....      | .....      | .....      |
| 1-2             | .....      | .....      | .....      |
| 1-3             | .....      | .....      | .....      |
| 2-1             | .....      | .....      | .....      |
| 2-2             | .....      | .....      | .....      |
| 3-1             | .....      | .....      | .....      |
| 3-2             | .....      | .....      | .....      |
| 3-3             | .....      | .....      | .....T     |
| 3-4             | .....      | .....      | .....      |
| 4-DS            | .....      | .....      | .....      |

|                 | 1          |            | *           |            | *           |
|-----------------|------------|------------|-------------|------------|-------------|
| Consensus BO-28 | TGTATAATGC | CTCTATTGGC | AGTACATAGT  | ACATTTTACT | GCATATTCGT  |
| 1-1             | .....      | .....      | .....       | .....      | .....       |
| 1-2             | .....      | .....      | .....       | .....      | .....       |
| 1-3             | .....      | .....      | .....       | .....      | .....       |
| 1-4             | .....      | .....      | .....       | .....      | .....       |
| 1-5             | .....      | .....      | .....       | .....      | .....       |
| 2-1             | .....      | .....      | .....       | .....      | .....       |
| 2-2             | .....      | .....      | .....       | .....      | .....       |
| 2-3             | .....      | .....      | .....       | .....      | .....       |
| 2-4             | .....      | .....      | .....       | .....      | .....       |
| 2-5             | .....      | .....      | .....       | .....      | .....       |
| 2-6             | .....      | .....      | .....       | .....      | .....       |
| 2-7             | .....      | .....      | .....       | .....      | .....       |
| 3-1             | .....      | .....      | .....       | .....      | .....       |
| 3-2             | .....      | .....      | .....       | .....      | .....       |
| 3-3             | .....      | .....      | .....       | .....      | .....C..... |
| 3-4             | .....      | .....      | .....       | .....      | .....       |
| 3-5             | .....      | .....      | .....G..... | .....      | .....       |
| 3-6             | .....      | .....      | .....       | .....      | .....       |
| 4-1             | .....      | .....      | .....       | .....      | .....       |
| 4-2             | .....      | .....      | .....       | .....      | .....       |
| 4-3             | .....      | .....      | .....       | .....      | .....       |
| 4-4             | .....      | .....      | .....       | .....      | .....       |
| 4-5             | .....      | .....      | .....       | .....      | .....       |
| 4-6             | .....      | .....      | .....       | .....      | .....       |
| 4-7             | .....      | .....      | .....       | .....      | .....       |
| 5-DS            | .....      | .....      | .....       | .....      | .....       |
| 6-DS            | .....      | .....      | .....       | .....      | .....       |

|                 | 51         | *          |            |            |            |
|-----------------|------------|------------|------------|------------|------------|
| Consensus BO-28 | ACATGGCACA | TAGAGTCAAA | TCCATTCTTG | CCAACATGCG | TATCCCGTCC |
| 1-1             | .....      | ..-----    | -----      | -----      | -----      |
| 1-2             | .....      | .....      | .....      | .....      | .....      |
| 1-3             | .....      | .....      | .....      | .....      | .....      |
| 1-4             | .....      | .....      | .....      | .....      | .....      |
| 1-5             | ...NNN...  | .....      | .....      | .....      | .....      |
| 2-1             | .....      | .....      | .....      | .....      | .....----  |
| 2-2             | .....      | .....      | .....      | .....      | .....----  |
| 2-3             | .....      | .....      | .....      | .....      | .....----  |
| 2-4             | .....      | .....      | .....      | .....      | .....----  |
| 2-5             | .....      | .....      | .....      | .....      | .....----  |
| 2-6             | .....      | .....      | .....      | .....      | .....----  |
| 2-7             | .....      | .....      | .....      | .....      | .....----  |
| 3-1             | .....      | ..A.....   | .....      | .....      | .....----  |
| 3-2             | .....      | ..A.....   | .....      | .....      | .....----  |
| 3-3             | .....      | ..A.....   | .....      | .....      | .....----  |
| 3-4             | .....      | ..A.....   | .....      | .....      | .....----  |
| 3-5             | .....      | ..A.....   | .....      | .....      | .....----  |
| 3-6             | .....      | ..A.....   | .....      | .....      | .....----  |
| 4-1             | .....      | .....      | .....      | .....      | .....----  |
| 4-2             | .....      | .....      | .....      | .....      | .....----  |

|      |       |       |       |       |       |       |
|------|-------|-------|-------|-------|-------|-------|
| 4-3  | ..... | ..... | ..... | ..... | ..... | ----- |
| 4-4  | ..... | ..... | ..... | ..... | ..... | ----- |
| 4-5  | ..... | ..... | ..... | ..... | ..... | ----- |
| 4-6  | ..... | ..... | ..... | ..... | ..... | ----- |
| 4-7  | ..... | ..... | ..... | ..... | ..... | ----- |
| 5-DS | ..... | ..... | ..... | ..... | ..... | ..... |
| 6-DS | ..... | ..... | ..... | ..... | ..... | ..... |

101           \*

|                 |            |            |            |
|-----------------|------------|------------|------------|
| Consensus BO-28 | ACTAGATCAC | GAGCTTGTTG | ACCATGCCGC |
| 1-1             | -----      | -----      | -----      |
| 1-2             | .....T..   | .....      | .....      |
| 1-3             | .....T..   | .....      | .....      |
| 1-4             | .....T..   | .....      | .....      |
| 1-5             | .....T..   | .....      | .....      |
| 2-1             | -----      | -----      | -----      |
| 2-2             | -----      | -----      | -----      |
| 2-3             | -----      | -----      | -----      |
| 2-4             | -----      | -----      | -----      |
| 2-5             | -----      | -----      | -----      |
| 2-6             | -----      | -----      | -----      |
| 2-7             | -----      | -----      | -----      |
| 3-1             | -----      | -----      | -----      |
| 3-2             | -----      | -----      | -----      |
| 3-3             | -----      | -----      | -----      |
| 3-4             | -----      | -----      | -----      |
| 3-5             | -----      | -----      | -----      |
| 3-6             | -----      | -----      | -----      |
| 4-1             | -----      | -----      | -----      |
| 4-2             | -----      | -----      | -----      |
| 4-3             | -----      | -----      | -----      |
| 4-4             | -----      | -----      | -----      |
| 4-5             | -----      | -----      | -----      |
| 4-6             | -----      | -----      | -----      |
| 4-7             | -----      | -----      | -----      |
| 5-DS            | .....      | .....      | .....      |
| 6-DS            | .....      | .....      | .....      |
