# Supplementary material
Source: PubMed Central journal article supplement (PMC1622831)
Supplement: pnas_0602753103_2.pdf [file pnas_0602753103_2.pdf]

1

|            |            |            |            |            |            |   |   |   |   |    |
|------------|------------|------------|------------|------------|------------|---|---|---|---|----|
|            | *          | **         | **         | *          | **         | * | * | * | * | ** |
| cons.BO-02 | TGTACAATGC | TTCTATCGGC | AGTACATAGT | ACATTTTACT | GCATATTCGT |   |   |   |   |    |
| cons.BO-23 | .....      | .....      | .....      | .....      | .....      |   |   |   |   |    |
| cons.BO-28 | ....T....  | C.....T..  | .....      | .....      | .....      |   |   |   |   |    |
| cons.BO-11 | .....AT    | CC.....AT  | .....G.C   | .....C..T. | .T...CC... |   |   |   |   |    |
| cons.BO-14 | .....AT    | CC.....AT  | .....G.C   | .....C..T. | .T...CC... |   |   |   |   |    |
| cons.BO-15 | .....AT    | CC.....AT  | .....G.C   | .....C..T. | .T...CC... |   |   |   |   |    |
| cons.BO-19 | .....AT    | CC.....AT  | .....G.C   | .....C..T. | .T...C.... |   |   |   |   |    |

51

|            |            |            |            |            |            |   |   |   |
|------------|------------|------------|------------|------------|------------|---|---|---|
|            | *          | *          | **         | *          | *          | * | * | * |
| cons.BO-02 | ACATGGCACA | TGGAGTCAAA | TCCATTCTCG | CCAACATGCG | TATCCCGTCC |   |   |   |
| cons.BO-23 | .....      | .....      | .....      | .....      | .....      |   |   |   |
| cons.BO-28 | .....      | .A.....    | .....T.    | .....      | .....      |   |   |   |
| cons.BO-11 | ...A..G..  | ..A.....   | ..G.C...   | T.....A    | .....      |   |   |   |
| cons.BO-14 | ...A..G..  | ..A.....   | ..G.C...   | T.....A    | .....      |   |   |   |
| cons.BO-15 | ...A..G..  | ..A.....   | ..G.C...   | T.....A    | .....      |   |   |   |
| cons.BO-19 | ...A..G..  | ..A.....   | ..G.C...   | T.....A    | .....      |   |   |   |

101

|            |                                  |
|------------|----------------------------------|
|            | *                                |
| cons.BO-02 | ACTAGATCAC GAGCTTGTTG ACCATGCCGC |
| cons.BO-23 | .....                            |
| cons.BO-28 | .....                            |
| cons.BO-11 | .....C                           |
| cons.BO-14 | .....C                           |
| cons.BO-15 | .....C                           |
| cons.BO-19 | .....C                           |
