# Supplementary material
Source: PubMed Central journal article supplement (PMC1622831)

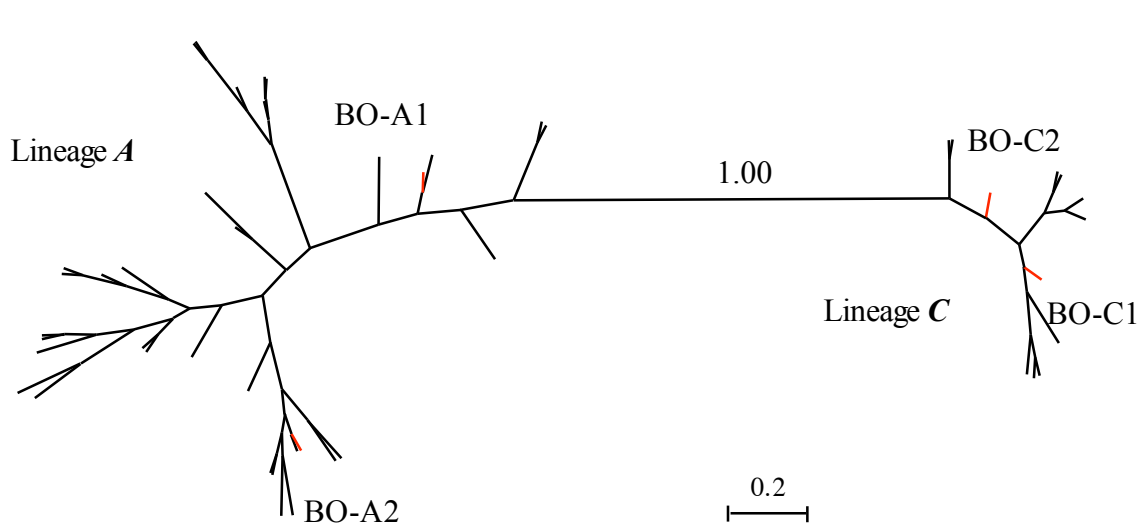

Supplement: pnas_0602753103_3.pdf [file pnas_0602753103_3.pdf]
